# Supplementary material
Source: publisher site journal article supplement (https://www.dovepress.com/article/296726)
Supplement: Supplementary file 1 [file get_supplementary_file.php]

**Supplementary Material**

**Methods**

**Solubility Study of Sulpiride**

Saturation solubility of SUL was determined in water, 0.1N HCL pH 1.2, and phosphate buffer pH 6.8 as previously reported.1 An excess amount of SUL was added to 5 mL of different mediums in well-closed glass vials. These vials were tightly closed and shaken for 24 h at 37± 0.5°C in a thermostatically controlled water bath. Then, the dispersions were left for equilibrium for another 24 h then filtered through 0.45 µm membrane filter. Sulpiride concentration was determined at λmax 292 nmusing HPLC equipped with a photodiode array detector. The experiment was performed in triplicate.


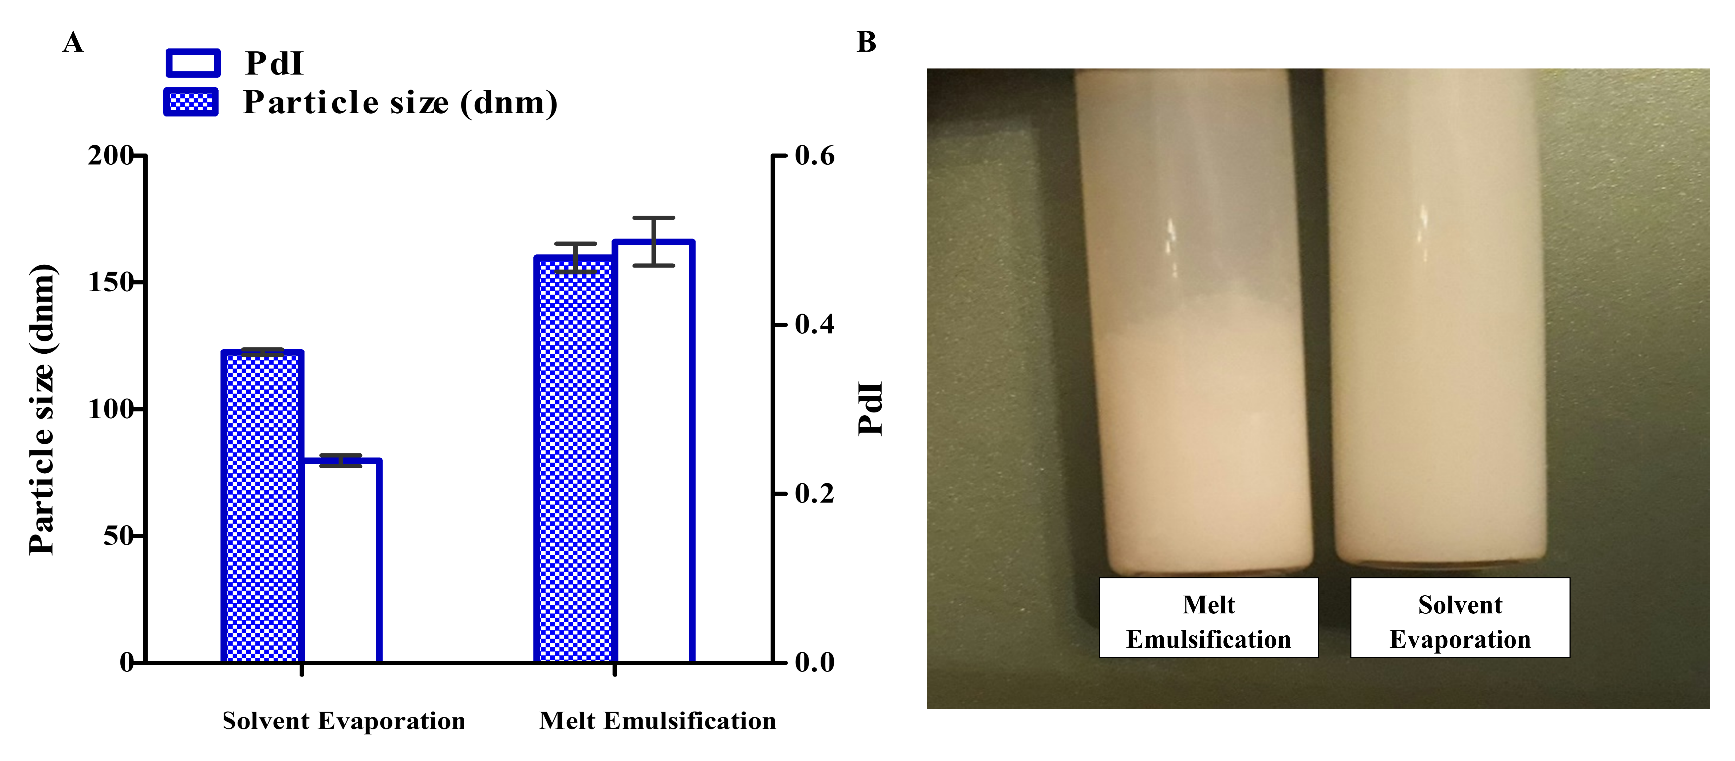
**Results**

**Figure S1:**(A) Physicochemical characteristics of the investigated dispersions formulated via either melt-emulsification or solvent evaporation techniques, Values represented as mean ± SD. (n = 3). (B) Lipospheres prepared by the two different techniques after storing at 4 for 24 h

**Table S1:** In-vitro Release kinetic parameters for SUL from the elaborated nanoplatforms (F9, F15, and F18, Table 1) in 0.1N HCl pH 1.2 for 2h, then phosphate buffer pH 6.8 for 8 h at 37 °C.

| **F** | **Zero-order model** | | **First-order model** | | **Higuchi model** | | **Weibull model** | | | **Korsmeyer-Peppas model** | | |
| --- | --- | --- | --- | --- | --- | --- | --- | --- | --- | --- | --- | --- |
| **K0**  **(%h-1)** | **R2** | **K1**  **(% h-1)** | **R2** | **KH**  **(% h-1/2)** | **R2** | **α** | **β** | **R2** | **KKP**  **(% h-n)** | **n** | **R2** |
| **F9** | 11.971 | 0.1264 | 0.327 | 0.6403 | 30.844 | 0.8165 | 1.783 | 0.447 | 0.9742 | 42.219 | 0.290 | 0.9619 |
| **F15** | 11.521 | 0.1114 | 0.294 | 0.6179 | 29.757 | 0.8126 | 1.879 | 0.441 | 0.9741 | 40.723 | 0.290 | 0.9589 |
| **F18** | 11.351 | 0.4030 | 0.251 | 0.7663 | 28.692 | 0.9751 | 2.21 | 0.513 | 0.9925 | 35.930 | 0.351 | 0.9823 |

K0, K1, KH, and KKP are the release rate constant for zero-order, first-order, Higuchi, and Korsmeyer-Peppas models, respectively. R2 is the correlation coefficient;α and βarethe time scale and shape parameters for Weibull model, respectively;n is the release exponent for Korsmeyer-Peppas model.

| **Storage Time (month)** | **Particle Size**  **d-nm** | **PdI** | | **Zeta potential**  **(mV)** | | **%DC** |
| --- | --- | --- | --- | --- | --- | --- |
| **0** | 80.05 ± 1.78 | 0.287 ± 0.01 | -30.2 ± 4.81 | | 89.83 ± 4.73 | |
| **1** | 77.22 ± 0.33 | 0.209 ± 0.03 | -27.6 ± 5.59 | | 88.32 ± 6.98 | |
| **2** | 86.89 ± 0.20 | 0.224 ± 0.01 | -29.8 ± 6.06 | | 85.46 ± 1.46 | |
| **3** | 86.12 ± 7.28 | 0.253 ± 0.04 | -26.1 ± 4.36 | | 87.74 ± 2.45 | |

**Table S2:** Stability profile of SUL-LPS (F18) stored at room temperature (25 ± 2°C) over a period of 3 months.

Values expressed as mean ± S.D., n=3

**Abbreviations:** **%DC**, percentage of drug content; **PdI,** polydispersity index; **SUL-LPS**, Sulpiride-loaded lipospheres.

**References**

1. Shehata EM, Elnaggar YS, Galal S, Abdallah OY. Self-emulsifying phospholipid pre-concentrates (SEPPs) for improved oral delivery of the anti-cancer genistein: Development, appraisal and ex-vivo intestinal permeation. Int J Pharm. 2016;511(2):745-756.
